# Supplementary material
Source: Atypon-hosted journal article supplement (https://www.archive.jpma.org.pk/PdfDownloadsupplements/490)
Supplement: 490 [file 490]

## Cardiovigilance in COVID 19

Kamal Kishor,<sup>1</sup> Rishabh Marwah,<sup>2</sup> Avinash Anantharaj,<sup>3</sup> Sanjay Kalra<sup>4</sup>

### Abstract

The COVID19 (Corona Virus Disease: pandemic started in 2019) pandemic has created not only a public health problem, but as a clinical challenge as well. To the cardiologist, COVID 19 presents a wide spectrum of possibilities for clinical decision-making intervention and improvement. Cardiac dysfunction has been identified as a risk factor, a prognostic factor, a diagnostic tool, differential diagnosis, a complication of COVID 19, and a side effect of its treatment. Certain cardiotropic drugs have been implicated in the pathogenesis of COVID 19. The risk of transmission of COVID 19 is an occupational hazard which cannot be ignored by cardiologists. This review discusses the need and scope of cardio vigilance in COVID 19 management.

**Keywords:** Cardiovascular, Conduction defects, Coronavirus, Diabetes, Heart failure, Myocarditis.

**DOI:** <https://doi.org/10.5455/JPMA.14>

### Risk Factor

COVID 19 has been found to be more common in persons with hypertension and preexisting cardiovascular disease (CVD). In a retrospective Chinese study, 30% of all indoor COVID19 patients had hypertension, while 8% had coronary heart disease.<sup>1</sup> The infection is also more common in the elderly, and in those with diabetes, who are prone to CVD. CVD thus emerges as a major risk factor for COVID 19.

### Pathogenesis

The angiotensin converting enzyme 2(ACE2) which has a vital role in heart function and vascular homeostasis, has been implicated as a functional receptor for coronaviruses. The COVID-19 protein (SARS-CoV-2 spike protein) binds to ACE2, which is present in high concentrations in the heart and lungs. Since ACE2 is highly expressible in diseased human heart, patient with underlying heart disease remain at high risk for acquiring COVID19 infection.<sup>2</sup>

### Clinical Features

Clinical features and laboratory findings in COVID19

.....  
<sup>1,2</sup>Department of Cardiology, Rama Hospital, Karnal, <sup>3</sup>Department of Cardiology, JIPMER, Pondicherry, <sup>4</sup>Department of Endocrinology, Bharti Hospital, Karnal, India.

**Correspondence:** Kamal Kishor. Email: drkml99@gmail.com

patients show overlap with cardinal symptoms related to cardiac patient. Table-1 summarize the differential diagnosis of COVID 19 based on different clinical features and laboratory abnormalities.

### Prognostic Factor

The presence of CVD is taken as a poor prognostic factor for COVID 19 outcomes. In a Chinese study, people with COVID 19 and concomitant CVD experienced more severe symptoms, and were less likely to survive than their peers without CVD.<sup>3</sup> Persons with acute coronary syndrome have reduced cardiac functional reserve, and this impacts outcomes. The infection acts as a precipitating factor for cardiorespiratory decompensation, and may cause death.<sup>4</sup> In resource-constrained settings, the presence of CVD may be used as a variable for triage of COVID 19 patients. It must be noted here that CVD is a heterogenous group of diseases: all persons with CVD need not necessarily have a poor prognosis. The duration of CVD, its nature, extent and severity, as well as current cardiorespiratory fitness, should all be factored in while performing a triage for COVID 19 treatment.

### Cardio Vigilance With Pharmacotherapy

Concern has been raised regarding safety of angiotensin converting enzyme inhibitors (ACEi) and angiotensin receptor blockers (ARBs) and chloroquine/hydroxychloroquine in the COVID19 pandemic. Treating physicians should practice appropriate cardio vigilance while administering such therapy.

### Angiotensin Converting Enzyme Inhibitors (ACEI) and Angiotensin Receptor Blockers (ARBs) and COVID19

The use of angiotensin converting enzyme inhibitors (ACEi) and angiotensin receptor blockers (ARBs) has been linked with an increase in ACE2 levels in patients with diseased human heart, which puts them at risk of acquiring COVID19 infection more frequently. Also, this may decompensate the otherwise stable cardiac function. However, current expert advice recommends against discontinuation of these drugs. Recent statements by the ESC council on hypertension ". this speculation about the safety of ACEi or ARB treatment in relation to COVID-19 does not have a

**Table-1:** Symptoms and Laboratory findings in COVID9 patients that may overlap with cardiac symptoms.

|                   | COVID19                                        | STEMI                                    | Myocarditis                                                  | ADHF                     | Acute IE                    | PE                          |
|-------------------|------------------------------------------------|------------------------------------------|--------------------------------------------------------------|--------------------------|-----------------------------|-----------------------------|
| Fever             | +++                                            | +/-                                      | ++                                                           | -                        | ++++                        | +/-                         |
| Chest pain        | +                                              | ++++                                     | ++                                                           | +/-                      | +/-                         | ++                          |
| SOB               | ++++                                           | +                                        | ++++                                                         | ++++                     | +/-                         | +++                         |
| Cough             | ++++                                           | +/-                                      | ++                                                           | +++                      | +/-                         | ++                          |
| ECG               | Non-Specific<br>ST-T Changes/<br>AF/APCs/VPCs  | ST Elevation/<br>rhythm<br>abnormalities | Nonspecific<br>sinus tachycardia/<br>rhythm<br>abnormalities | Tachycardia<br>AF/VPCs   | Sinus<br>Tachycardia/<br>AF | Sinus<br>Tachycardia/<br>AF |
| WBC               | Low                                            | High but usually limited<br>to 20000/mm3 | Viral Etiology:++<br>Bacterial:++++                          | Normal/Mild<br>Increased | Very High                   | Normal/Mild<br>Increased    |
| Platelets         | Low-Normal                                     | Normal                                   | Normal                                                       | Normal                   | Normal                      | Normal                      |
| TROP I            | Increased if associated<br>with myocarditis    | Markedly<br>Increased                    | Increased                                                    | Increased                | Normal                      | Increased                   |
| BNP/NT-<br>ProBNP | Increased if<br>associated with<br>myocarditis | Mildly<br>Increased                      | Mild<br>Increased                                            | Markedly<br>Increased    | Normal                      | Mild<br>Increased           |
| D DIMER           | Increased                                      | Mildly<br>Increased                      | Mild<br>Increased                                            | Normal                   | Markedly<br>Increased       | Markedly<br>Increased       |

ADHF: Acute decompensated heart failure. AF: Atrial fibrillation, IE: Infective endocarditis, PE: Pulmonary embolism, STEMI: ST Elevation myocardial infarction.

sound scientific basis or evidence to support it. Indeed, there is evidence from studies in animals suggesting that these medications might be rather protective against serious lung complications in patients with COVID-19 infection, but to date there is no data in humans." will give confidence to professionals regarding judicious use of drugs that have been tested in multiple RCTs.<sup>5</sup>

We suggest a 'Do not start, do not stop' policy, continuing these agents in patients who are stable on them, but choosing drugs of other classes to initiate or intensity cardiotropic therapy if needed.

### Hydroxychloroquine/Chloroquine and COVID19

While there is no specific antiviral treatment for COVID 19, limited evidence has shown that drugs like hydroxychloroquine and azithromycin may be used to manage the condition. Both these drugs are known to prolong QT intervals and lead to life-threatening arrhythmias.<sup>6,7</sup> However, larger studies have demonstrated the cardiovascular safety and benefit of hydroxychloroquine.<sup>8,9</sup> Although needs to be consumed with caution the risk of life-threatening events is being dominated by mass fear perpetuating in the community due to COVID pandemic. Cardiovascular side effects of hydroxychloroquine and chloroquine may range from benign atrioventricular block, pulmonary hypertension, sick sinus syndrome to sudden cardiac death. Further significant drug interaction has been noted with

concomitant use of digoxin (increase digoxin level) and other drugs resulting in prolongation of QT interval leading to torsades de pointes and lethal ventricular arrhythmias.

### Impact of COVID-19 on Short- and Long-Term CV Health

Although the specific data related to long term follow up of COVID19 patients is lacking, hospitalization for pneumonia is associated with increased short-term and long-term risk of CVD.<sup>10</sup> Insight can also be gained from survivors of the severe acute respiratory syndrome (SARS)-coronavirus epidemic. A 12 year follow up survey revealed a high prevalence of cardiometabolic disorders: 68% dyslipidemias, 60% dysglycaemia and 44% cardiovascular dysfunction<sup>11</sup> in such survivors.

### Impact of COVID-19 on Heart Care

In absence of guidelines for management of cardiac emergencies at the time of highly transmissible infection balancing cardiac emergencies and COVID19 is a global challenge. Focus is shifting from aggressive interventional approach to a more conservative strategy. The Sichuan protocol (Table-2 and 3) for managing ACS incorporate both COVID-19 prevention principles by World Health Organization and 'Save the heart, race against time' principle to the maximum.<sup>12</sup>

There is equipoise regarding the safety of offering heart transplantation during the COVID-19 pandemic. Expert recommendations suggest that donors with known or

**Table-2:** Management of suspected STEMI patients with potential risk of COVID-19 infection.

|                                                       |                                               |
|-------------------------------------------------------|-----------------------------------------------|
| STEMI<12 hr with no contraindication for thrombolysis | Thrombolysis in Emergency room                |
| STEMI<12 hr with contraindication for thrombolysis    | Antiplatelets/Vasodilator/Nitrate             |
| STEMI>12 hr                                           | Antiplatelets/Vasodilator/Nitrate             |
|                                                       | Shifting from Emergency Room on stabilization |
| Low risk for COVID19                                  | Shift to CCU                                  |
| High risk for COVID with test Negative                | Shift to CCU                                  |
| High risk for COVID with test positive                | Shift to Dedicated unit for COVID management  |

**Table-3:** Management of suspected USA/NSTEMI patients with potential risk of COVID-19 infection.

|                                              |                                                                                                                                                             |
|----------------------------------------------|-------------------------------------------------------------------------------------------------------------------------------------------------------------|
| High Risk NSTEMI/UA and low risk for COVID19 | Shift to CCU/Invasive strategy                                                                                                                              |
| High Risk for COVID19/ Low risk NSTEMI       | Antiplatelets/Vasodilator/Nitrate in ER. Shift to:<br>(a)CCU if COVID19 negative.<br>(b)Dedicated COVID19 unit if COVID positive                            |
| High Risk for COVID19/High risk NSTEMI       | Antiplatelets/Vasodilator/Nitrate in ER.<br>(a)COVID19 negative: Shift to CCU, pursue invasive strategy.<br>(b)COVID19 positive: Shift to Dedicated COVID19 |

**Table-4:** Cardiovigilance in COVID-19: ten points to ponder.

|                                                                                                                                                                                                                                                                                                                                                                                                                                                                                                                                                                                                                                                                                                                                 |
|---------------------------------------------------------------------------------------------------------------------------------------------------------------------------------------------------------------------------------------------------------------------------------------------------------------------------------------------------------------------------------------------------------------------------------------------------------------------------------------------------------------------------------------------------------------------------------------------------------------------------------------------------------------------------------------------------------------------------------|
| <ul style="list-style-type: none"> <li>◆ Cardiovascular disease (CVD) is a risk factor for COVID 19</li> <li>◆ Cardiovascular mechanisms are implicated in the pathogenesis of COVID 19</li> <li>◆ CVD is a differential diagnosis of COVID19</li> <li>◆ Cardiovascular tests are used to diagnose COVID 19</li> <li>◆ CVD can be a complication of COVID 19</li> <li>◆ CVD can be a complication of COVID 19 treatment</li> <li>◆ CVD is a prognostic factor for COVID 19 outcomes.</li> <li>◆ COVID19 may impact long term cardiovascular health</li> <li>◆ COVID19 impacts delivery of routine cardiovascular care services</li> <li>◆ Exposure to COVID 19 infection is an occupational hazard for cardiologists</li> </ul> |
|---------------------------------------------------------------------------------------------------------------------------------------------------------------------------------------------------------------------------------------------------------------------------------------------------------------------------------------------------------------------------------------------------------------------------------------------------------------------------------------------------------------------------------------------------------------------------------------------------------------------------------------------------------------------------------------------------------------------------------|

suspected COVID-19 be avoided, unless they have been demonstrated to be COVID-19free (by PCR) for at least 14 days. Transplant recipients who contract COVID-19 should be treated as per standard of care. Doses of mycophenolate or azathioprine may have to be reduced.<sup>13</sup>

### Occupational Hazard

The risk of COVID 19 transmission from infected patients

is all too real. Cardiologists must practice personal protective prophylaxis (PPE) as per standard guidelines, while dealing with patients.

### Summary

COVID 19 presents multifactorial, complex associations with CVD and cardiological practice. Evidence supportive of the impact of COVID19 on the cardiovascular system is summarized in Table-4. The treating physician should be aware of these nuances while managing COVID 19.

### References

1. Zhou F, Yu T, Du R, Fan G, Liu Y, Liu Z, et al. Clinical course and risk factors for mortality of adult inpatients with COVID-19 in Wuhan, China: a retrospective cohort study. *The Lancet*. 2020 Mar 11.
2. Clerkin KJ, Fried JA, Raikhelkar J, Sayer G, Griffin JM, Masoumi A, et al. Coronavirus Disease 2019 (COVID-19) and Cardiovascular Disease. *Circulation*. 2020 Mar 21.
3. Wang D, Hu B, Hu C, Zhu F, Liu X, Zhang J, et al. Clinical characteristics of 138 hospitalized patients with 2019 novel coronavirus-infected pneumonia in Wuhan, China. *JAMA*. 2020 Feb 7.
4. Zheng YY, Ma YT, Zhang JY, Xie X. COVID-19 and the cardiovascular system. *Nature Reviews Cardiology*. 2020 Mar 5:1-2.
5. EMA advises continued use of medicines for hypertension, heart or kidney disease during COVID-19 pandemic. Available at: <https://www.ema.europa.eu/en/news/ema-advises-continued-use-medicines-hypertension-heart-kidney-disease-during-covid-19-pandemic>. Last accessed on 1 April 2020
6. Morgan ND, Patel SV, Dvorkina O. Suspected hydroxychloroquine-associated QT-interval prolongation in a patient with systemic lupus erythematosus. *JCR: Journal of Clinical Rheumatology*. 2013;19(5):286-8.
7. Hancox JC, Hasnain M, Vieweg WV, Crouse EL, Baranchuk A. Azithromycin, cardiovascular risks, QTc interval prolongation, torsade de pointes, and regulatory issues: a narrative review based on the study of case reports. *Therapeutic advances in infectious disease*. 2013;1(5):155-65.
8. Costedoat-Chalumeau N, Hulot JS, Amoura Z, Leroux G, Lechat P, Funck-Brentano C, et al. Heart conduction disorders related to antimalarials toxicity: an analysis of electrocardiograms in 85 patients treated with hydroxychloroquine for connective tissue diseases. *Rheumatology*. 2007;46(5):808-10.
9. Sharma TS, Wasko MC, Tang X, Vedamurthy D, Yan X, Cote J, et al. Hydroxychloroquine use is associated with decreased incident cardiovascular events in rheumatoid arthritis patients. *Journal of the American Heart Association*. 2016;5(1): e002867.
10. Corrales-Medina VF, Alvarez KN, Weissfield LA et al. Association Between Hospitalization for Pneumonia and Subsequent Risk of Cardiovascular Disease: *JAMA*. 2015; 313(3): 264-274
11. Wu Q, Zhou L, Sun X, Yan Z, Hu C, Wu J, Xu L, Li X, Liu H, Yin P, Li K. Altered lipid metabolism in recovered SARS patients twelve years after infection. *Scientific reports*. 2017;7(1):1-2.
12. Zeng J, Huang J, Pan L. How to balance acute myocardial infarction and COVID-19: the protocols from Sichuan Provincial People's Hospital. *Intensive care medicine*. 2020 Mar 11:1-3.
13. Aslam S, Mehra MR. COVID-19: Yet Another Coronavirus Challenge in Transplantation. *The Journal of Heart and Lung Transplantation*. 2020 Mar 14.
